# Supplementary material
Source: publisher figshare collection journal article supplement (https://gsajournals.figshare.com/ndownloader/files/13477475)
Supplement: Supplementary file 1 [file 13477475]

## Sheet: Table 5
Table 5. David analysis of gene enrichment from both genome-wide screens
Category	Term	Pathways	Count	%	PValue	Genes	List Total	Pop Hits	Pop Total	Fold Enrichment	Bonferroni	Benjamini	FDR	Negativelog10Benjamini
GOTERM_BP_DIRECT	GO:0015031~protein transport	protein transport	6	0.991736	8.26723e-05	ATG21, ARF1, NCE102	23	122	5681	12.1475	0.00338396	0.00338396	0.0760549	2.47057
GOTERM_MF_DIRECT	GO:0005525~GTP binding	GTP binding	4	0.661157	0.00552909	ARF1, CDC10	15	163	6084	9.95337	0.0433862	0.0219336	2.98973	1.65889
GOTERM_CC_DIRECT	GO:0000220~vacuolar proton-transporting V-type ATPase, V0 domain	vacuolar proton-transporting V-type ATPase, V0 domain	3	0.495868	0.000384462	VPH1	22	10	6961	94.9227	0.00766123	0.00383798	0.29224	2.4159
GOTERM_MF_DIRECT	GO:0015078~hydrogen ion transmembrane transporter activity	hydrogen ion transmembrane transporter activity	3	0.495868	0.000579355	VPH1	15	16	6084	76.05	0.00462546	0.00462546	0.316761	2.33485
GOTERM_CC_DIRECT	GO:0032126~eisosome	eisosome	4	0.661157	4.70625e-07	SUR7, NCE102	22	6	6961	210.939	9.41246e-06	9.41246e-06	0.000358188	5.0263
